# Supplementary material for: Impact of Multiple Air Pollutants on Probable Sarcopenia in the UK Population: The Mediating Role of Physical Activity and Biological Aging
Source: Research Square preprint supplement (doi:10.21203/rs.3.rs-7721102/v1), 2025-10-23
Supplement: Supplementary file 1 [file c1308107275aba0c71945015.docx]

**Supplementary Information**

- **Supplementary materials to the methodology**
- **Table S1.** OR (95% CI) for probable sarcopenia in relation to individual and mixed air pollution, with additional adjustment for occupation.
- **Table S2.** OR (95% CI) for probable sarcopenia in relation to individual and mixed air pollution, with additional adjustment for osteoarthritis.
- **Table S3.** Association of multiple air pollutants with physical activity (n=211808) and biological aging (n=172627).
- **Table S4.** Association of physical activity (n=211808) and biological aging (n=172627) with probable sarcopenia.
- **Table S5.** Estimated proportion of the relationships between multiple air pollutants and probable sarcopenia mediated by physical activity and biological aging.
- **Figure S1.** Directed acyclic graph for the association between air pollution and probable sarcopenia.
- **Figure S2.** Association between mixed air pollution and probable sarcopenia based on BKMR model.
- **Figure S3.** Individual and synergistic exposure effects of air pollutants on probable sarcopenia stratified by potential modifiers.
- **Figure S4.** Concentration-response relationship between mixed air pollution and (A) low ALM index and (B) slow walking pace.

**Supplementary materials to the methodology**

*Study population*

Participants were recruited from 22 centers across England, Wales, and Scotland at baseline between 2006 and 2010. Comprehensive information encompassing sociodemographics, lifestyle, and health was gathered using touchscreen questionnaires, physical measurements, and biological specimens.

*Definition of sarcopenia* *components and diagnosis of probable sarcopenia*

Hand grip strength: The maximum hand grip strength was measured for each hand using a Jamar J00105 hydraulic dynamometer and the average value was calculated and low muscle strength was defined as hand grip strength < 27 kg for males and < 16 kg for females.

ALM index: ALM was measured by the bioelectrical impedance analysis (Tanita BC418MA, Tokyo, Japan) and ALM index was calculated by dividing ALM by height2, as follows: ALMI (kg/m2) = ALM (kg) / Height (m)2. Low muscle mass was identified as ALM index<7.0 kg/m2 for males and <5.5 kg/m2 for females.

Walking pace: Walking pace was self-reported and classified into slow (<3 miles per hour), steady/average (3-4 miles per hour), and fast (>4 miles per hour). Given that objective gait speed was not available in UK Biobank data, slow walking pace of < 3 miles/h was used to estimate physical performance, instead of low gait speed of < 0.8m/s in EWGSOP2 criteria.

*Assessment of air pollution exposure*

Air pollution data were derived from Geographic Information Systems to construct LUR models. The ESCAPE monitoring quantified the spatial air pollution in specific time period by linking it to residential locations of participants during the baseline visit. Because ESCAPE monitoring campaigns and available measurements varied by pollutant, we used the most appropriate surface for each agent to provide robust assessments of long-term residential contrasts: annual concentrations for PM2.5, PM2.5-10, and NOx were estimated for 2010, while the annual concentrations for PM10 and NO2 were averaged over several years (2007 and 2010 for PM10; 2005, 2006, 2007, and 2010 for NO2).

*Covariates*

Information on sociodemographic status include age (years), sex (male or female), ethnicity (White, Asian, Black, Mixed, and others), educational level (under high school, high school or equivalent, and above high school), and the Townsend deprivation index (TDI, derived from the latest national census output areas). Health-related factors contained smoking status (non-smoker or smoker), drinking status (non-drinker or drinker), body mass index (BMI, calculated as weight in kilograms divided by height in meters squared), and comorbidities (yes or no) relevant to either air pollution or sarcopenia (including hypertension, cancer, diabetes, cardiovascular diseases and respiratory diseases).

Physical activity was quantified by total Metabolic Equivalent Task (MET) hours per week for all types of activities (including walking, moderate- and vigorous-intensity activities) using the short form International Physical Activity Questionnaire (IPAQ). Physical inactivity was identified if physical activity amount in a week failed to meet either: (1) Three or more days of vigorous-intensity activity lasting at least 20 minutes per day; OR; (2) Five or more days of moderate-intensity activity and/or walking for at least 30 minutes per day; OR (3) Five or more days of any combination of walking, moderate- or vigorous-intensity activities totaling a minimum of 600 MET minutes per week.

Biological aging was accessed using two validated and widely applied clinical-parameter biological age algorithms: Klemera-Doubal method biological age (KDM-BA) and the phenotypic age (PhenoAge). KDM-BA reflects the chronological age with approximately normal physiological function [16], while PhenoAge represents the age with approximately normal mortality risk within a reference population [17]. The calculation of these two biological age types employed well-established algorithms that incorporated 13 clinical biomarkers (forced expiratory volume in one second (FEV₁), systolic blood pressure, total cholesterol, glycated hemoglobin, albumin, creatinine, C-reactive protein, alkaline phosphatase, blood urea nitrogen, glucose, red cell distribution width, mean cell volume, white blood cell count, and lymphocyte proportion), performed by R package *BioAge* [18]. All input biomarkers were converted into the units required by the package documentation (e.g., serum creatinine in mg/dL, HbA1c in %, albumin in g/dL, etc.) prior to computation. For biomarkers with repeated measurements in UK Biobank (e.g. FEV₁, systolic blood pressure), the mean of up to three assessments was used to reduce measurement error. Participants with missing biomarker data were excluded. Extreme values were retained, as they accounted for <0.1% of the sample distribution; sensitivity analyses excluding values >4 standard deviations from the mean yielded similar results. In this study, age accelerations, calculated as the residuals of these biomarkers adjusted for chronological age, was used to indicate the rate of biological aging.

*Statistical analysis*

Data are expressed as means ± standard deviation for continuous variables, and percentages for categorical variables. Baseline variables were described descriptively according to the status of probable sarcopenia and compared using standard mean difference (SMD), given the large sample size of this study. SMD quantifies the standardized difference between groups for both continuous and categorical variables, with values <0.1 indicating balanced characteristics and values ≥0.1 suggesting potential imbalance requiring covariate adjustment in subsequent analyses. It’s noting that concentrations of air pollutants were presented as continuous variables and also categorized into four quartiles (Q1, Q2, Q3, and Q4). The percentage of missing values across variables varied between 0.09% and 23.3% in this study. To reduce selection and information biases, missing data for demographic and categorical variables were directly excluded (Figure 1) and the rest continuous variables (physical activity, BMI and ALM) were imputed utilizing the multiple imputation by chained equations (MICE) procedure via the R package “Mice”. Notably, biological aging (KDM-BA and PhenoAge) were not imputed because they are composite measures derived from multiple clinical biomarkers, and imputing them as single variables might break their underlying structure and introduce additional uncertainty. To address the study objectives — estimating individual and joint (mixture) effects of ambient pollutants and examining potential mediating pathways — analyses proceeded as follows.

Cross-sectional analysis of individual effects. Univariate and multivariate logistic regression models were utilized to estimate the relationship between air pollution and probable sarcopenia. Four models were developed with parameter estimates shown as odds ratios (ORs) and 95% confidence intervals (95% CIs): Model 1: adjusted for the sociodemographic status (age, sex, ethnicity, education level, TDI); Model 2: further adjusted for health-related factors (smoking, drinking, BMI and comorbidity); Model 3: further adjusted for physical activity (MET hours/week). DAG-based model: adjusted for confounders selected from directed acyclic graph (age, sex, ethnicity, education level, TDI and smoking status). The DAG was conducted by an online website tool DAGitty v3.1 ([https://dagitty.net/dags.html#](https://dagitty.net/dags.html)), illustrating the primary interactions among exposures, outcomes, covariates, and mediators (Figure S1).

Combined effects. For the exposure of mixed air pollution, the Pearson correlation method was implemented to examine pairwise correlations among air pollutants. Weighted quantile sum (WQS) regression was applied to evaluate synergistic effects on probable sarcopenia. The WQS indexes were calculated by R package “gWQS” based on quartiles of air pollutants, reflecting the contribution of each air pollutant to the overall effect. Restricted cubic spline (RCS) regression was employed to further elucidate the concentration-response relationship. Bayesian kernel machine regression (BKMR) was implemented as a complementary approach to accommodate potential non-linear and non-additive interactions within the pollutant mixture.

Sensitivity analyses. (1). To address potential non-linear and non-additive interactions among air pollutants, the joint effect of all pollutants and the exposure-response relationship between each air pollutant and probable sarcopenia (when controlling for concentrations of other pollutants) were evaluated by Bayesian kernel machine regression (BKMR) via the R package “BKMR”. (2). Stratified analyses were performed to further validate the impact of air pollution on probable sarcopenia and identify at-risk populations based on variables of age (>65, ≤65), sex (male or female), ethnicity (white or non-white), educational level (high school and above or under high school), TDI (≤0, >0), smoking and drinking status (yes or no), BMI (>30, ≤30), IPAQ (physical inactivity or normal), respectively. Inter-group disparities were assessed using two-sample z-tests. (3). The impact of air pollutions on other sarcopenia components (low muscle mass and slow walking speed) were further examined. (4). We additionally controlled for participants' occupations and osteoarthritis status, which affected both muscle strength and physical activity. Notably, occupations involve mainly walking/standing and heavy manual work (yes or no).

Mediation analyses. Parallel mediation models (R package “mediation”) were used to quantify indirect (average causal mediation effect, ACME) and direct (average direct effect, ADE) effects of pollutant exposures on probable sarcopenia mediated via candidate pathways (physical activity, KDM-BA and PhenoAge acceleration). For transparency we report A-path (exposure to mediator) and B-path (mediator to outcome) regression coefficients and P values, tested exposure–mediator interaction (and performed mediation with INT = TRUE when present), and obtained inference via bootstrap with sims = 2000.

Longitudinal analyses. Incident probable sarcopenia was modelled using Cox proportional hazards regression (R package “survival”) with DAG-based covariate adjustment; individuals with probable sarcopenia at baseline were excluded. Follow-up time was defined from baseline assessment to incident event, death, loss to follow-up, or last available follow-up date. Proportional hazards assumptions were assessed using Schoenfeld residuals. Results are reported as hazard ratios (HRs) with 95% CIs.

**Table S1.** OR (95% CI) for probable sarcopenia in relation to individual and mixed air pollution, with additional adjustment for occupation.

| **Air pollutants** | **Continuous** | **Q1** | **Q2** | **Q3** | **Q4** |
| --- | --- | --- | --- | --- | --- |
| (10ug/m3) | OR (95% CI) |  | OR (95% CI) | OR (95% CI) | OR (95% CI) |
| NOx | **1.11 (1.08, 1.14)** | 1.00 (ref) | **1.12 (1.06, 1.19)** | **1.32 (1.24, 1.40)** | **1.35 (1.27, 1.44)** |
| NO2 | **1.06 (1.06, 1.07)** | 1.00 (ref) | **1.12 (1.06, 1.19)** | **1.31 (1.24, 1.39)** | **1.23 (1.16, 1.31)** |
| PM2.5 | **1.41 (1.16, 1.72)** | 1.00 (ref) | **1.12 (1.06, 1.19)** | **1.20 (1.13, 1.27)** | **1.14 (1.07, 1.21)** |
| PM10 | **1.35 (1.22, 1.50)** | 1.00 (ref) | **1.12 (1.05, 1.18)** | **1.21 (1.14, 1.28)** | **1.20 (1.13, 1.27)** |
| PM2.5-10 | 1.15 (0.92, 1.43) | 1.00 (ref) | **1.08 (1.02, 1.14)** | **1.08 (1.02, 1.15)** | **1.11 (1.06, 1.17)** |
| Mixed air pollution | **1.12 (1.09, 1.16)** | 1.00 (ref) | **1.12 1.05, 1.19)** | **1.33 (1.25, 1.41)** | **1.36 (1.28, 1.45)** |

Bold represents P value < 0.05

Models adjusted for age, sex, ethnicity, education level, TDI, smoking status (DAG-based model) and occupation of participants (including mainly walking/standing and heavy manual work)

**Table S2.** OR (95% CI) for probable sarcopenia in relation to individual and mixed air pollution, with additional adjustment for osteoarthritis.

| **Air pollutants** | **Continuous** | **Q1** | **Q2** | **Q3** | **Q4** |
| --- | --- | --- | --- | --- | --- |
| (10ug/m3) | OR (95% CI) |  | OR (95% CI) | OR (95% CI) | OR (95% CI) |
| NOx | **1.12 (1.09, 1.15)** | 1.00 (ref) | **1.12 (1.06, 1.19)** | **1.32 (1.24, 1.40)** | **1.37 (1.29, 1.40)** |
| NO2 | **1.03 (1.02, 1.04)** | 1.00 (ref) | **1.12 (1.06, 1.19)** | **1.31 (1.23, 1.39)** | **1.24 (1.16, 1.32)** |
| PM2.5 | **1.43 (1.17, 1.75)** | 1.00 (ref) | **1.12 (1.06, 1.19)** | **1.20 (1.13, 1.27)** | **1.14 (1.07, 1.21)** |
| PM10 | **1.36 (1.22, 1.51)** | 1.00 (ref) | **1.12 (1.05, 1.19)** | **1.21 (1.15, 1.29)** | **1.21 (1.14, 1.28)** |
| PM2.5-10 | 1.15 (0.93, 1.43) | 1.00 (ref) | **1.08 (1.02, 1.14)** | **1.09 (1.03, 1.15)** | **1.12 (1.06, 1.18)** |
| Mixed air pollution | **1.13 (1.10, 1.17)** | 1.00 (ref) | **1.12 1.05, 1.19)** | **1.33 (1.25, 1.41)** | **1.38 (1.29, 1.41)** |

Bold represents P value < 0.05

Models adjusted for age, sex, ethnicity, education level, TDI, smoking status (DAG-based model) and osteoarthritis status

**Table S3.**Association of multiple air pollutants with physical activity (n=211808) and biological aging (n=172627).

| **Air pollution** | **Physical activity** | | **KDM-BA acceleration** | | **Phenoage acceleration** | |
| --- | --- | --- | --- | --- | --- | --- |
| (10 ug/m3) | β (95% CI) | P value | β (95% CI) | P value | β (95% CI) | P value |
| NOx | -1.15 (-1.42, -0.89) | <0.001* | 0.34 (0.25, 0.42) | <0.001* | 0.23 (0.19, 0.27) | <0.001* |
| NO2 | -0.35 (-0.48, -0.23) | <0.001* | 0.19 (0.15, 0.23) | <0.001* | 0.10 (0.08, 0.12) | <0.001* |
| PM2.5 | -5.04 (-6.91, -3.17) | <0.001* | 2.12 (1.52, 2.72) | <0.001* | 1.29 (1.00, 1.58) | <0.001* |
| PM10 | -2.51 (-3.50, -1.53) | <0.001* | 1.51 (1.20, 1.83) | <0.001* | 0.84 (0.69, 0.99) | <0.001* |
| PM2.5-10 | 0.32 (-1.74, 2.38) | 0.759 | 2.12 (1.46, 2.78) | <0.001* | 1.06 (0.75, 1.38) | <0.001* |
| Mixed air pollution | -1.26 (-1.55, -0.97) | <0.001* | 0.39 (0.29, 0.48) | <0.001* | 0.26 (0.21, 0.30) | <0.001* |

* P value < 0.05

**Table S4.** Association of physical activity (n=211808) and biological aging (n=172627) with probable sarcopenia.

|  | **Probable sarcopenia** | |
| --- | --- | --- |
|  | OR (95% CI) | P value |
| **Physical activity** (hours/week) | 0.989 (0.988, 0.989) | <0.001 |
| **KDM-BA acceleration** | 1.026 (1.024, 1.028) | <0.001 |
| **PhenoAge acceleration** | 1.063 (1.059, 1.066) | <0.001 |

* P value < 0.05

**Table S5.** Estimated proportion of the relationships between multiple air pollutants and probable sarcopenia mediated by physical activity and biological aging.

| **Air pollution** | **Physical activity** | **P value** | **KDM-BA acceleration** | **P value** | **Phenoage acceleration** | **P value** |
| --- | --- | --- | --- | --- | --- | --- |
| (10 ug/m3) | OR (95% CI) |  | OR (95% CI) |  | OR (95% CI) |  |
| **NOx** |  |  |  |  |  |  |
| Total effect | 1.0049 (1.0041, 1.0056) |  | 1.0032 (1.0023, 1.0041) |  | 1.0034 (1.0025, 1.0042) |  |
| Indirect effect | 1.0005 (1.0004, 1.0006) | <0.001** | 1.0003 (1.0002, 1.0004) | <0.001** | 1.0005 (1.0004, 1.0006) | <0.001** |
| Direct effect | 1.0044 (1.0036, 1.0050) | <0.001** | 1.0029 (1.0020, 1.0038) | <0.001** | 1.0029 (1.0020, 1.0037) | <0.001** |
| Proportion of mediation | 9.7% (7.4%, 13%) |  | 9.7% (6.4%, 14.8%) |  | 14.5% (10.4%, 21%) |  |
| **NO2** |  |  |  |  |  |  |
| Total effect | 1.0017 (1.0012, 1.0021) |  | 1.0008 (1.0003, 1.0013) |  | 1.0009 (1.0004, 1.0014) |  |
| Indirect effect | 1.0002 (1.0001, 1.0002) | <0.001** | 1.0002 (1.0002, 1.0003) | <0.001** | 1.0003 (1.0002, 1.0003) | <0.001** |
| Direct effect | 1.0111 (1.0085, 1.0131) | <0.001** | 1.0006 (1.0001, 1.0011) | 0.014* | 1.0006 (1.0001, 1.0011) | 0.020* |
| Proportion of mediation | 10.2% (6.7%, 15.6%) |  | 23.9% (14.4%, 58.2%) |  | 28.3% (17.7%, 71.3%) |  |
| **PM2.5** |  |  |  |  |  |  |
| Total effect | 1.0195 (1.0131, 1.0250) |  | 1.0086 (1.0001, 1.0156) |  | 1.0095 (1.0004, 1.0163) |  |
| Indirect effect | 1.0019 (1.0012, 1.0026) | <0.001** | 1.0021 (1.0014, 1.0028) | <0.001** | 1.0029 (1.0021, 1.0038) | <0.001** |
| Direct effect | 1.0167 (1.0104, 1.0223) | <0.001** | 1.0063 (0.9980, 1.0132) | 0.130 | 1.0061 (0.9973, 1.0128) | 0.004* |
| Proportion of mediation | 9.7% (5.3%, 17.1%) |  | 23.9% (7.6%, 124.7%) |  | 30.7% (11.4%, 151.9%) |  |
| **PM10** |  |  |  |  |  |  |
| Total effect | 1.0122 (1.0096, 1.0142) |  | 1.0080 (1.0046, 1.0107) |  | 1.0083 (1.0050, 1.0109) |  |
| Indirect effect | 1.0009 (1.0005, 1.0012) | <0.001** | 1.0013 (1.0010, 1.0016) | <0.001** | 1.0016 (1.0012, 1.0020) | <0.001** |
| Direct effect | 1.0111 (1.0085, 1.0131) | <0.001** | 1.0065 (1.0030, 1.0092) | <0.001** | 1.0063 (1.0031, 1.0091) | <0.001** |
| Proportion of mediation | 7.0% (4.0%, 11.4%) |  | 16% (9.8%, 33.8%) |  | 19.7% (11.8%, 38.3%) |  |
| **PM2.5-10** |  |  |  |  |  |  |
| Total effect | 1.0097 (0.9996, 1.0194) |  | 1.0015 (0.9901, 1.0117) |  | 1.0019 (0.9911, 1.0125) |  |
| Indirect effect | 0.9998 (0.9987, 1.0009) | 0.766 | 1.0024 (1.0016, 1.0034) | <0.001** | 1.0029 (1.0019, 1.0040) | <0.001** |
| Direct effect | 1.0099 (1.0000, 1.0196) | 0.050 | 0.9991 (0.9880, 1.0092) | 0.844 | 0.9991 (0.9882, 1.0094) | 0.874 |
| Proportion of mediation | -1.7% (-29.2%, 23.6%) |  | 167% (-627%, 566%) |  | 152% (-813%, 702%) |  |
| **Mixed air pollution** |  |  |  |  |  |  |
| Total effect | 1.0053 (1.0045, 1.0060) |  | 1.0035 (1.0025, 1.0043) |  | 1.0036 (1.0026, 1.0045) |  |
| Indirect effect | 1.0005 (1.0004, 1.0006) | <0.001** | 1.0004 (1.0003, 1.0005) | <0.001** | 1.0005 (1.0004, 1.0007) | <0.001** |
| Direct effect | 1.0048 (1.0040, 1.0054) | <0.001** | 1.0031 (1.0021, 1.0039) | <0.001** | 1.0031 (1.0020, 1.0039) | <0.001** |
| Proportion of mediation | 9.6% (7.2%, 12.7%) |  | 10.2% (6.8%, 15.5%) |  | 15% (11.1%, 22.6%) |  |

*P value<0.05

**P value <0.001


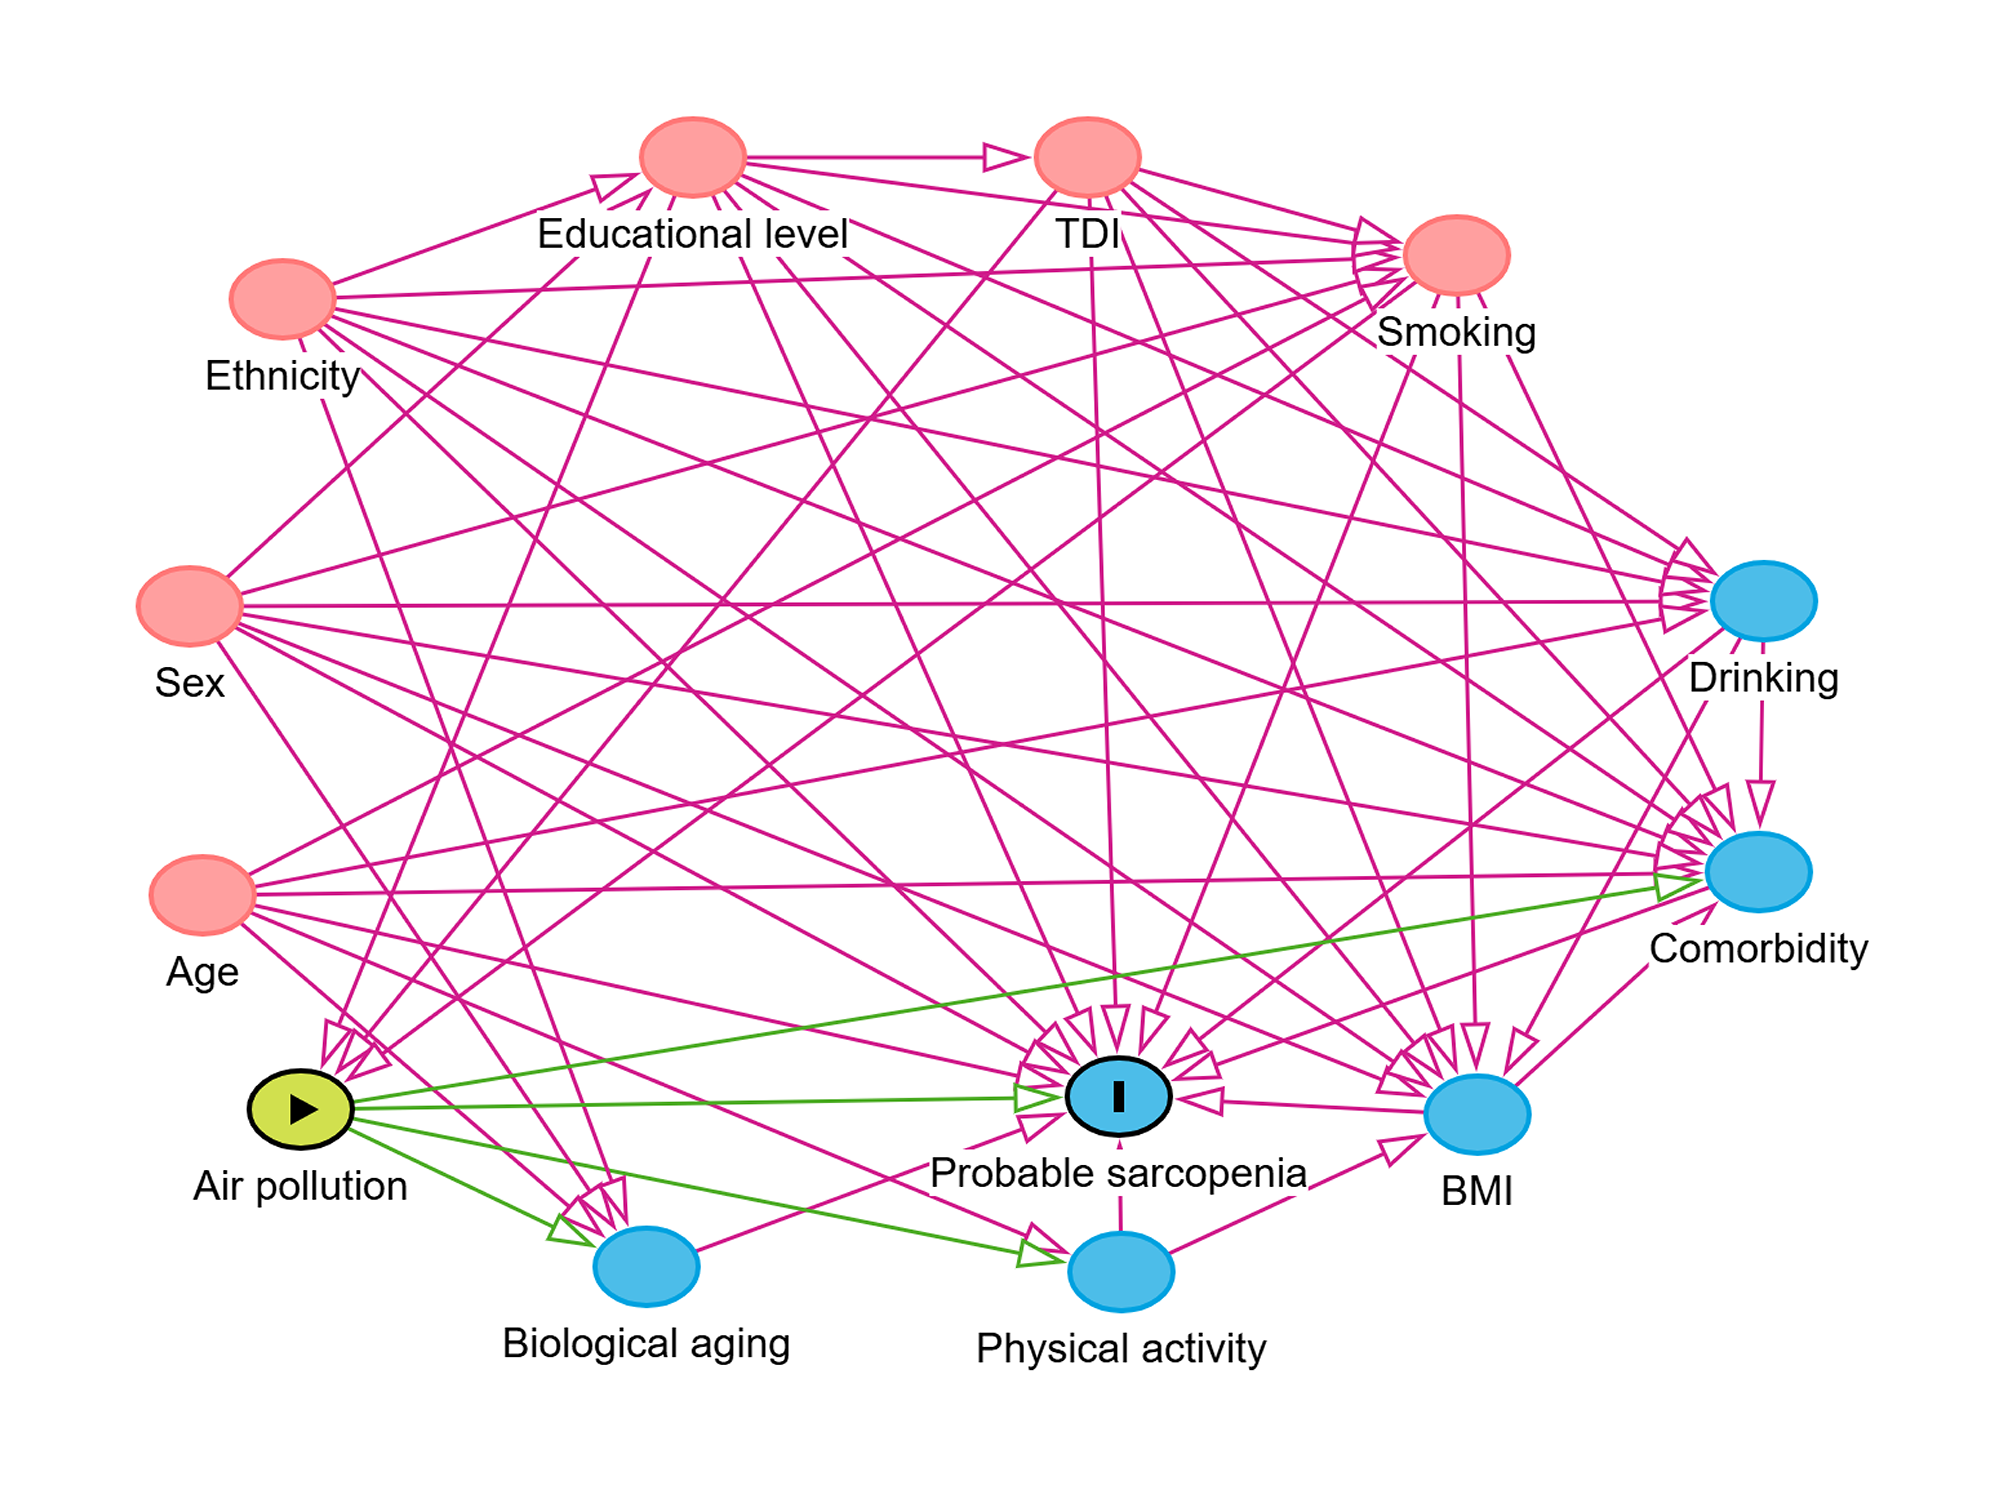


**Figure S1.** Directed acyclic graph for the association between air pollution and probable sarcopenia.


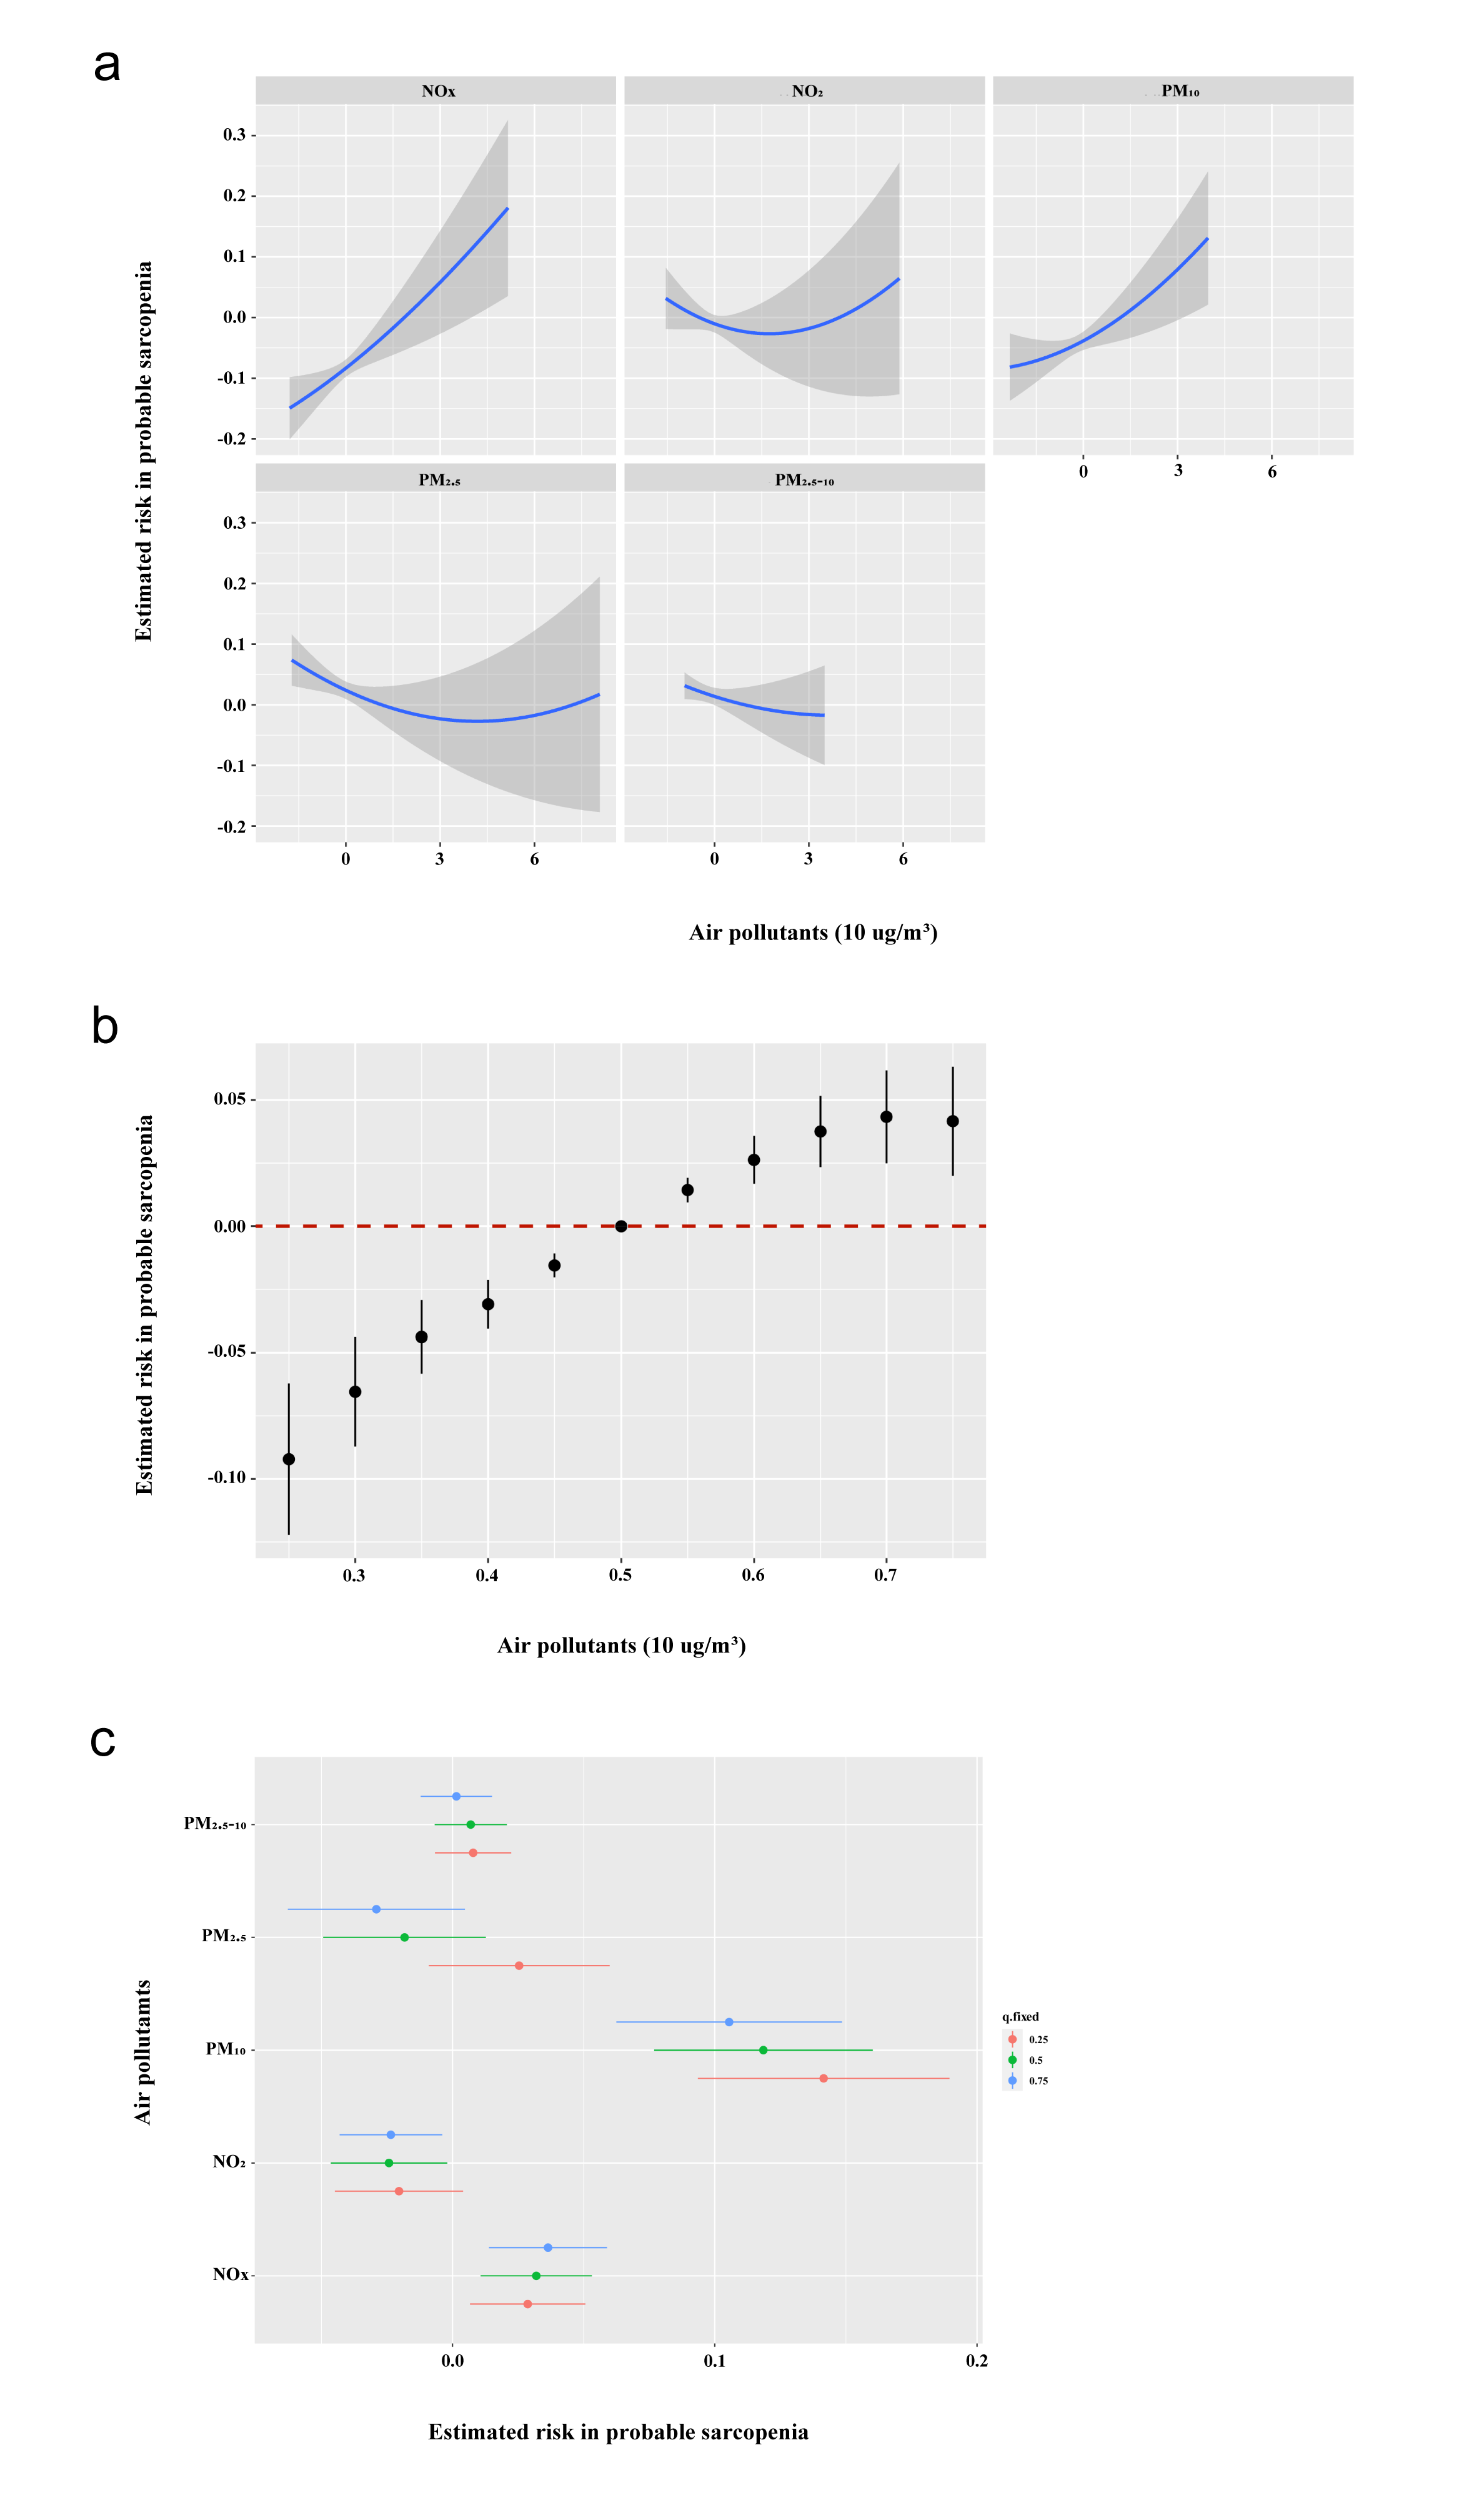


**Figure S2.** Association between mixed air pollution and probable sarcopenia based on BKMR model. (a) Individual air pollutant-exposure effect (95 % CI) on probable sarcopenia with the other air pollutants fixed at the median; (b) The joint effect of mixed air pollution on probable sarcopenia when concentrations of air pollutants were held at particular percentiles compared to their medians; (c) Individual air pollutant-exposure effect (95 % CI) on probable sarcopenia with other air pollutants fixed at a specific exposure percentile (25th, 50th, or 75th, respectively). Models were adjusted for covariates based on DAG.


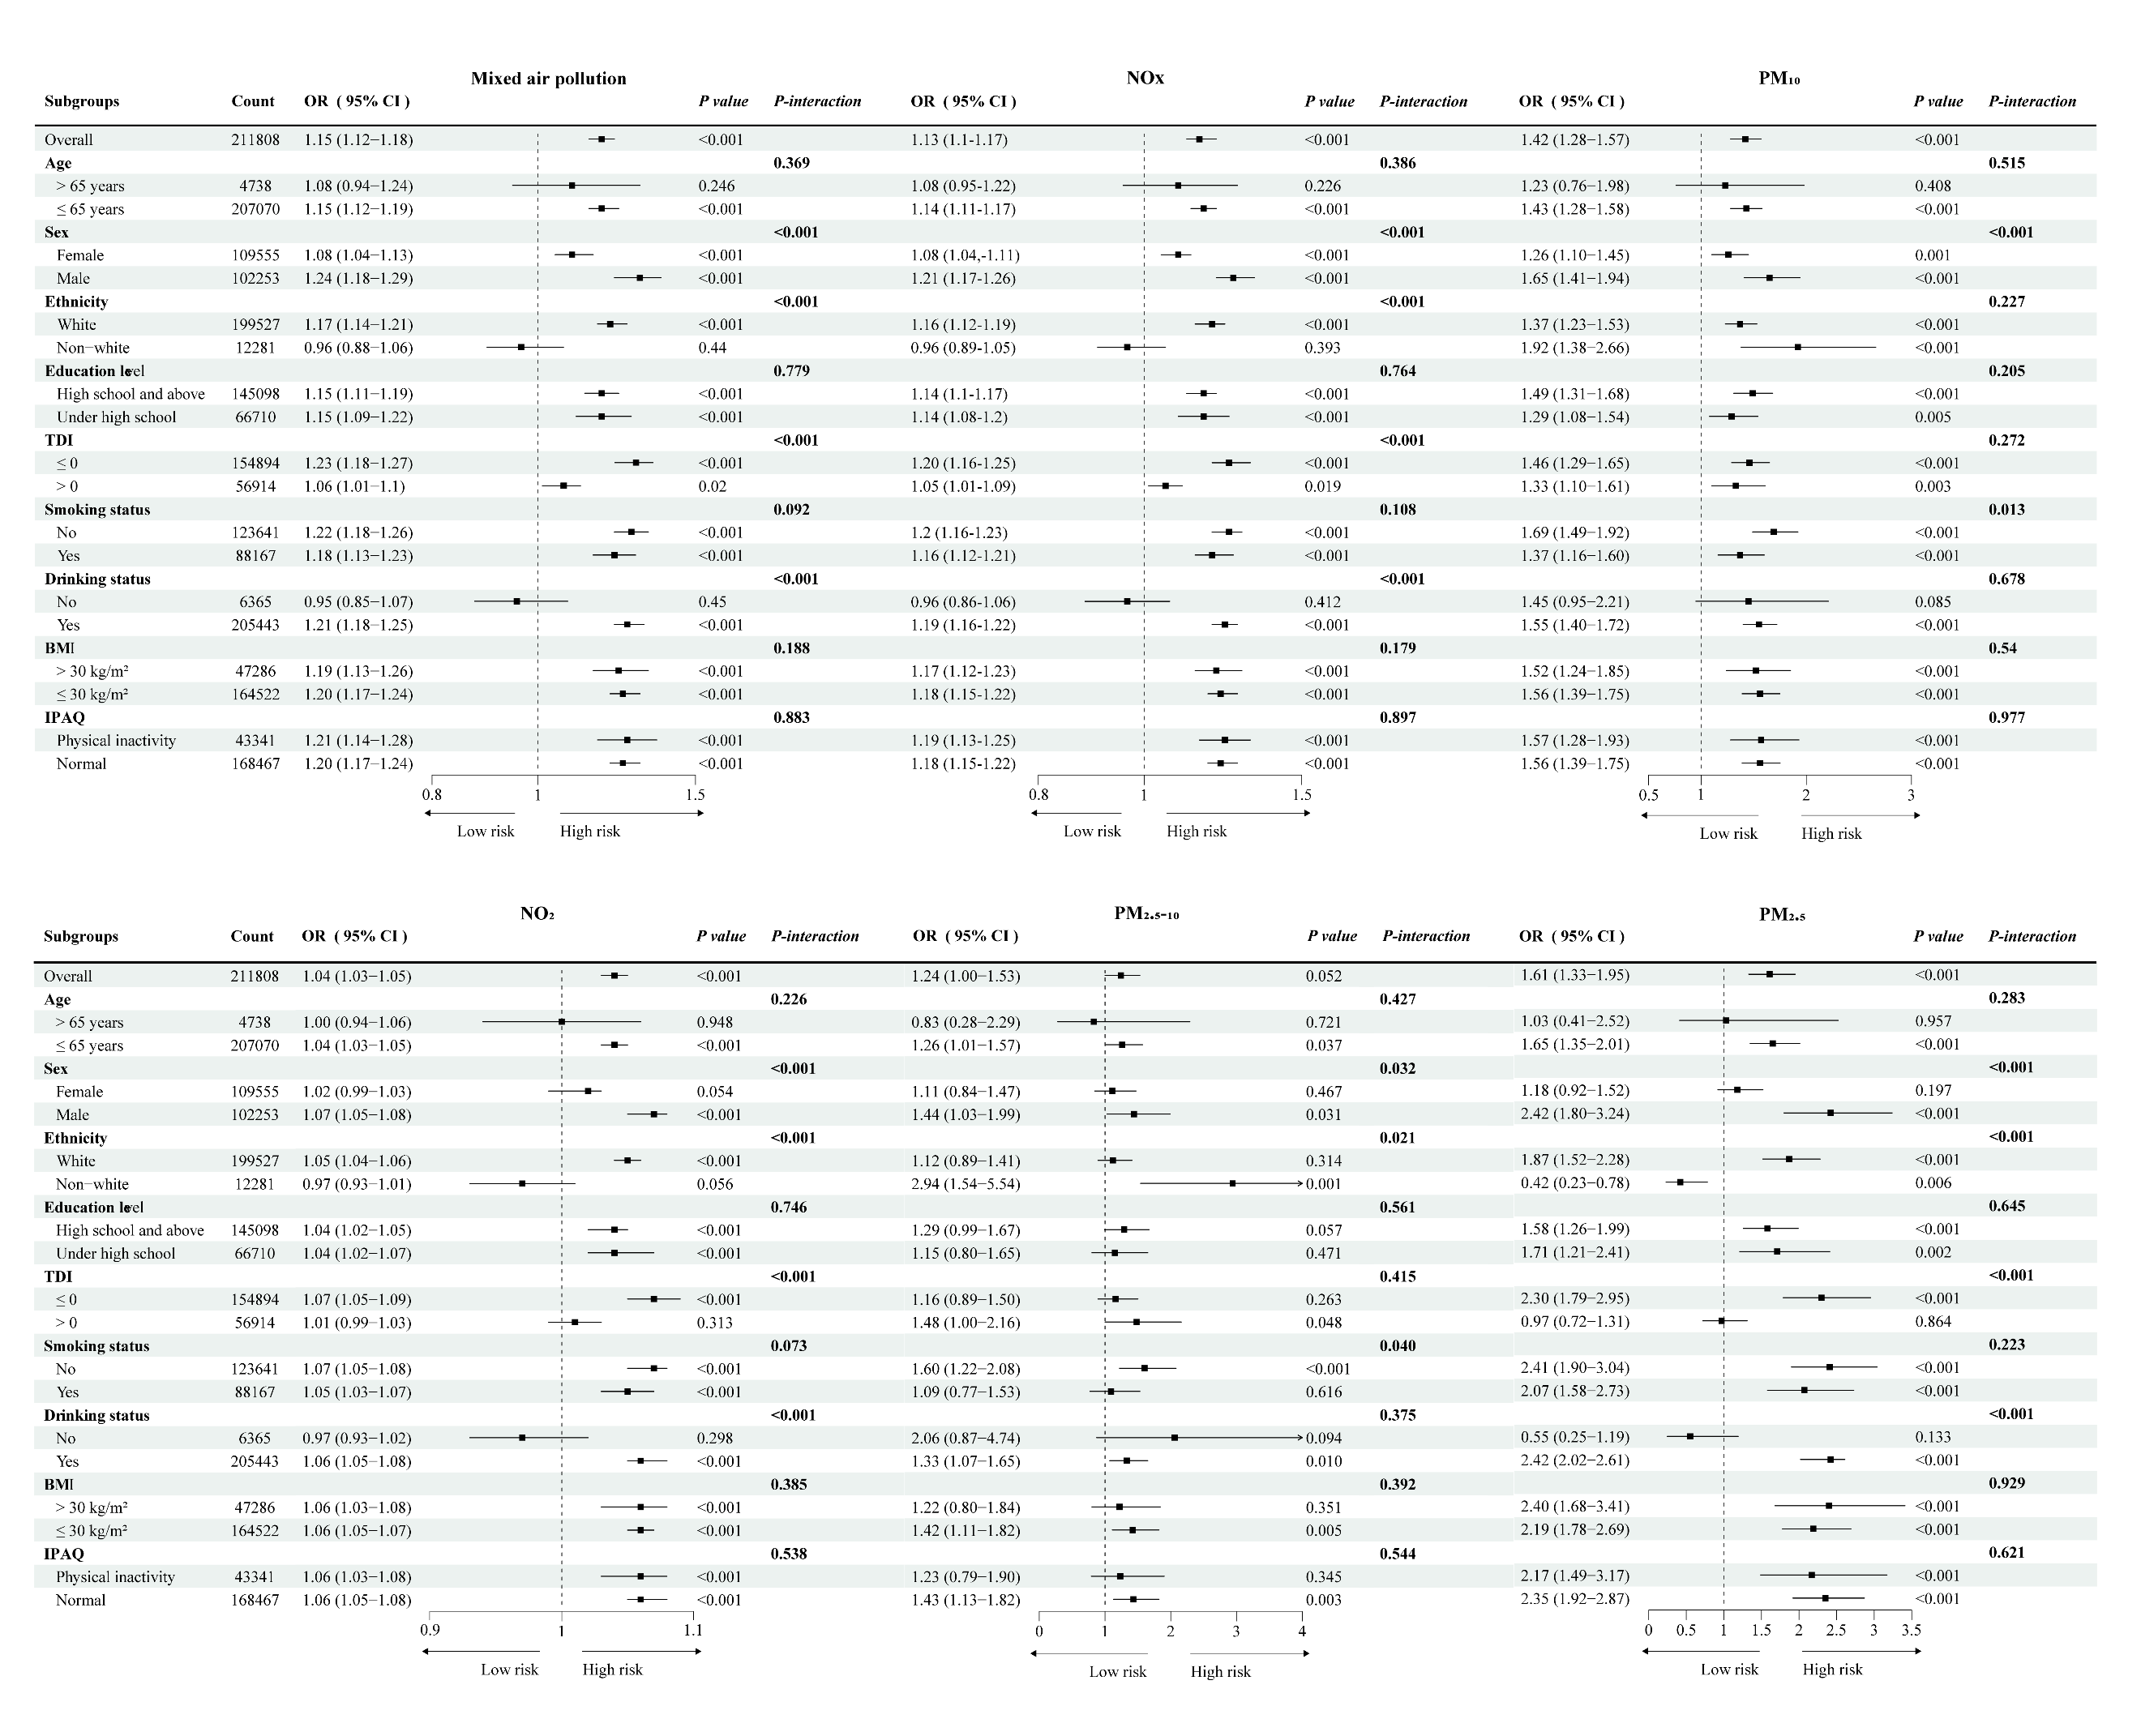


**Figure S3.** Individual and synergistic exposure effects of air pollutants on probable sarcopenia stratified by potential modifiers.


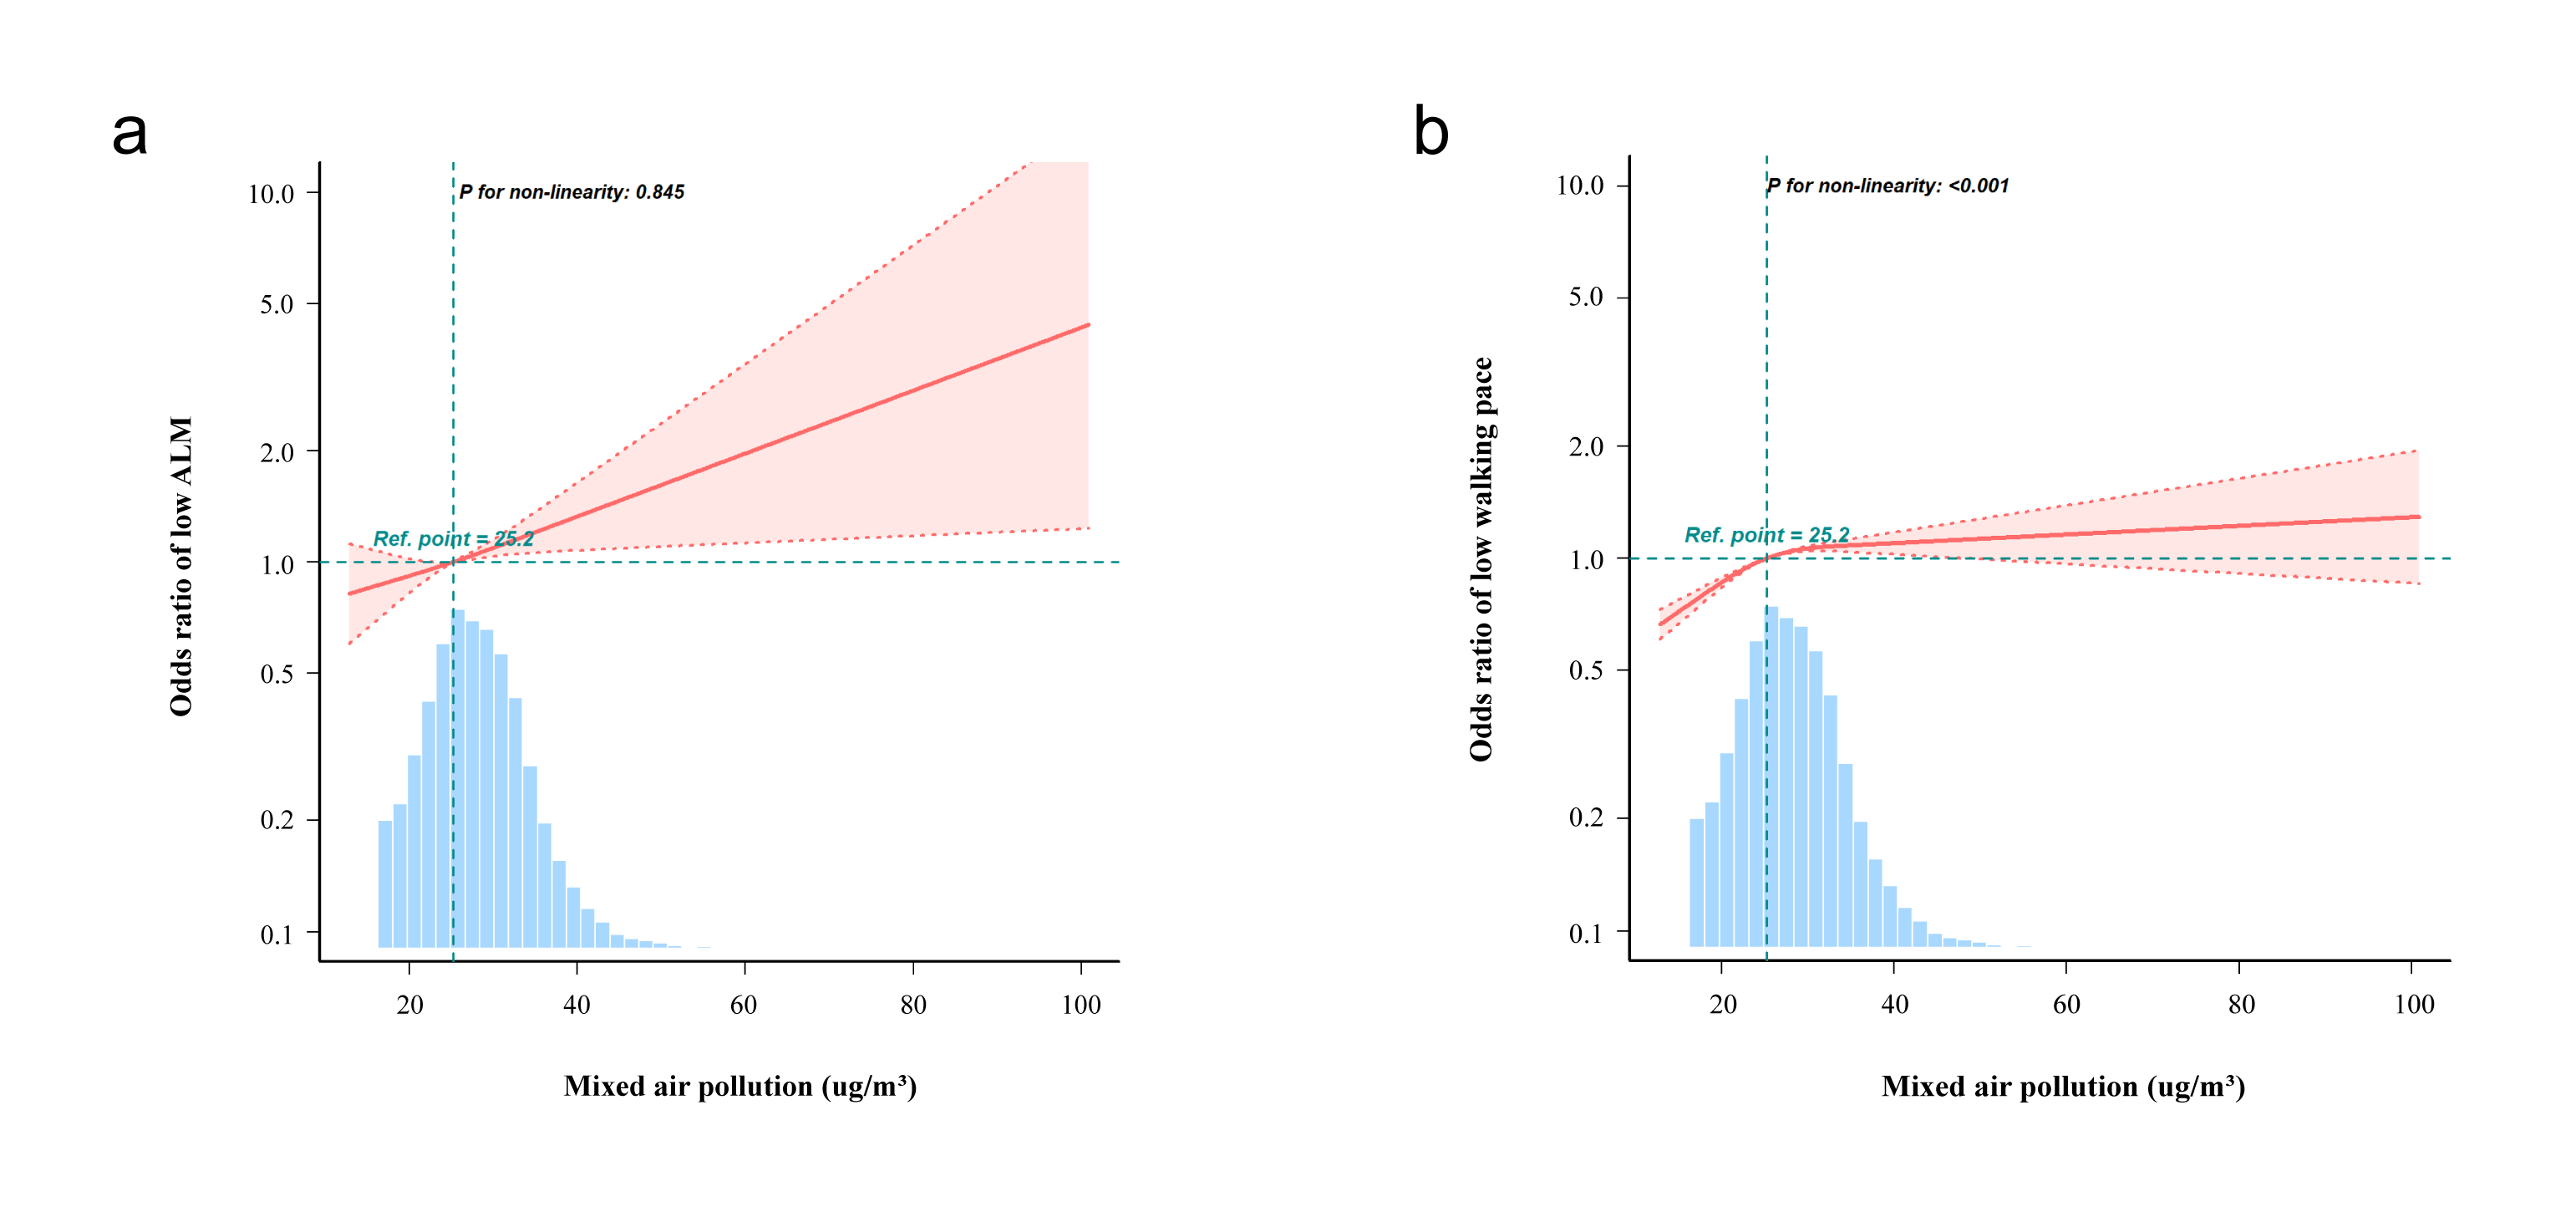


**Figure S4.** Concentration-response relationship between mixed air pollution and (a) low ALM index and (b) slow walking pace.
